# Supplementary material
Source: PubMed Central journal article supplement (PMC1069516)
Supplement: nar_33_6_1790__2.pdf [file nar_33_6_1790__2.pdf]

**Figure 9.** Effect of spermidine on uranyl cleavage of a bent A<sub>4</sub>T<sub>4</sub> and a non-bent T<sub>4</sub>A<sub>4</sub> sequence (four repeats of each). Autoradiographs showing uranyl cleavage of A<sub>4</sub>T<sub>4</sub> (**A**) and T<sub>4</sub>A<sub>4</sub> (**C**) in the absence and in the presence of 50, 100, 200, 400, 800 1600 μM spermidine (lane 2-8). Lane 1 is the uncleaved free DNA and lane S is an A/G sequence reaction. Bold numbers on the left side of the autoradiographs indicate the position of A/T-rich sequences. Densitometric scans (**B**: A<sub>4</sub>T<sub>4</sub> and **D**: T<sub>4</sub>A<sub>4</sub>) of the autoradiographs show uranyl cleavage in the absence and in the presence of 200, 400 and 1600 μM spermidine (**A**) and 400, 800 and 1600 μM spermidine (**B**). The DNA sequence is annotated on the scan. Regions with A-tracts and AT-rich sequences are indicated and underlined. The orientation of the DNA is indicated with 5' and 3'
