# Supplementary material
Source: PubMed Central journal article supplement (PMC1069516)

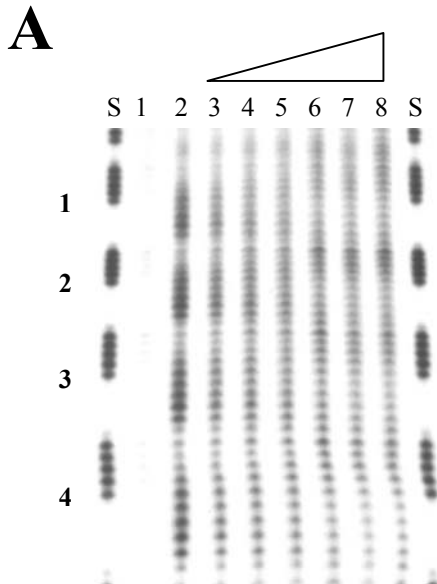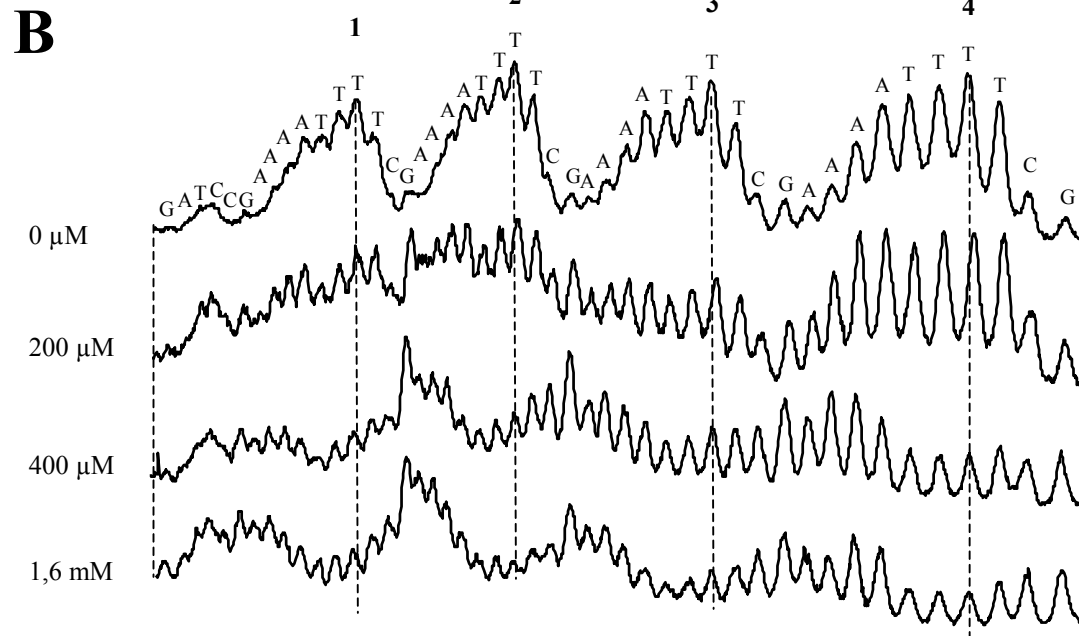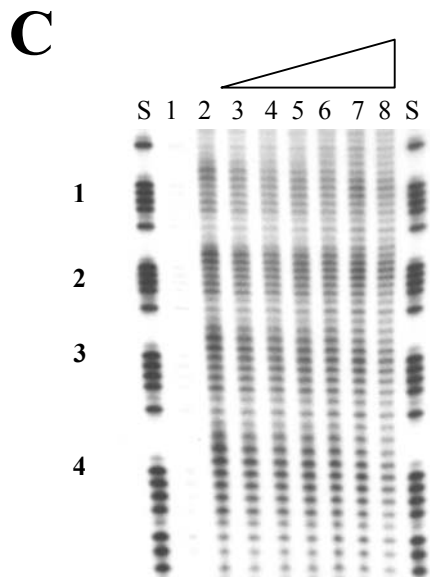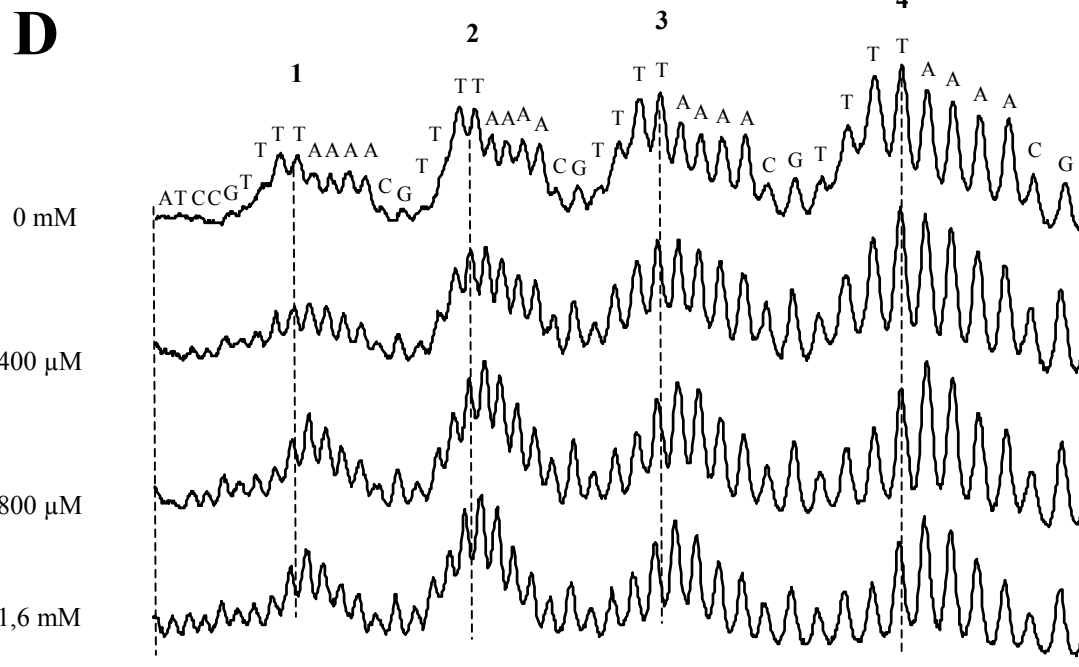

Supplement: nar_33_6_1790__1.pdf [file nar_33_6_1790__1.pdf]
